# Supplementary material for: Moderate mechanical stimulation rescues degenerative annulus fibrosus by suppressing caveolin-1 mediated pro-inflammatory signaling pathway
Source: PubMed Central journal article supplement (PMC8040478; doi:10.7150/ijbs.57774), 2021-04-03
Supplement: ijbsv17p1395s1.pdf [file ijbsv17p1395s1.pdf]

## Supplementary Materials

Figure S1

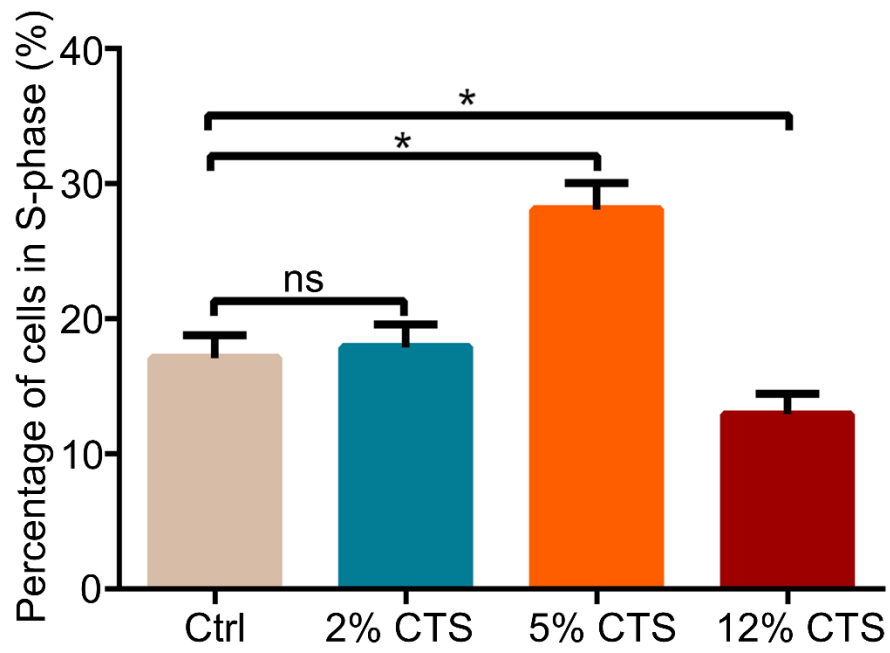

**Figure S1.** Percentage of S phase in cells under different mechanical conditions.

(\* $p < 0.05$ , <sup>ns</sup> $p > 0.05$  vs. Ctrl). The error bars indicate SD. N = 3.

Figure S2

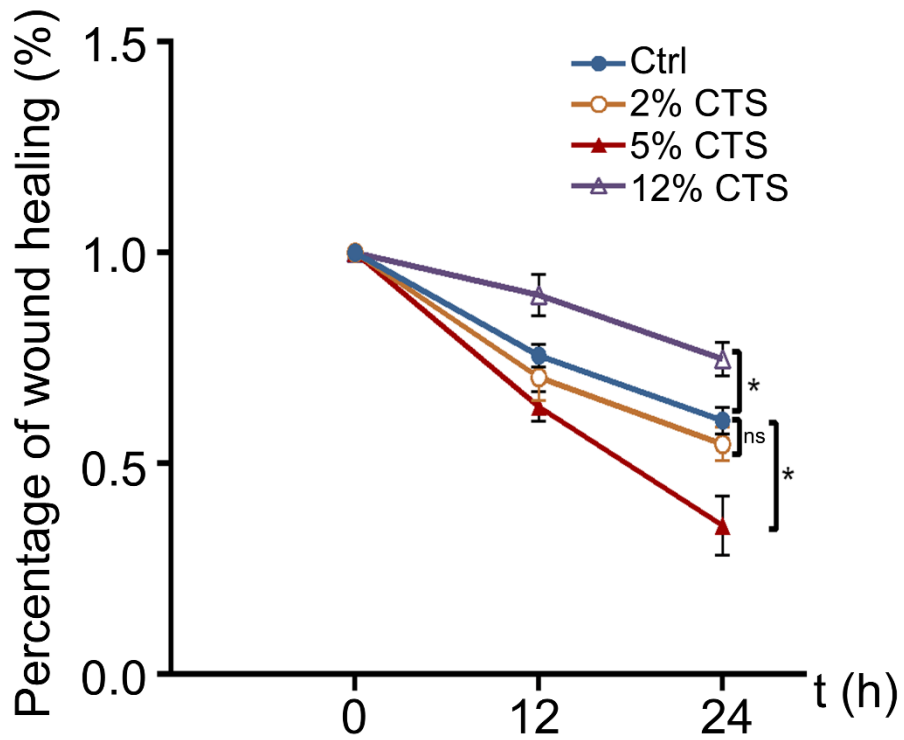

**Figure S2.** Wound closure expressed as the remaining area uncovered by the cells. The scratch area at time point 0 hours was set to 1. ( $*p < 0.05$ ,  $^{ns}p > 0.05$  vs. Ctrl). The error bars indicate SD. N = 3.

**Figure S3**

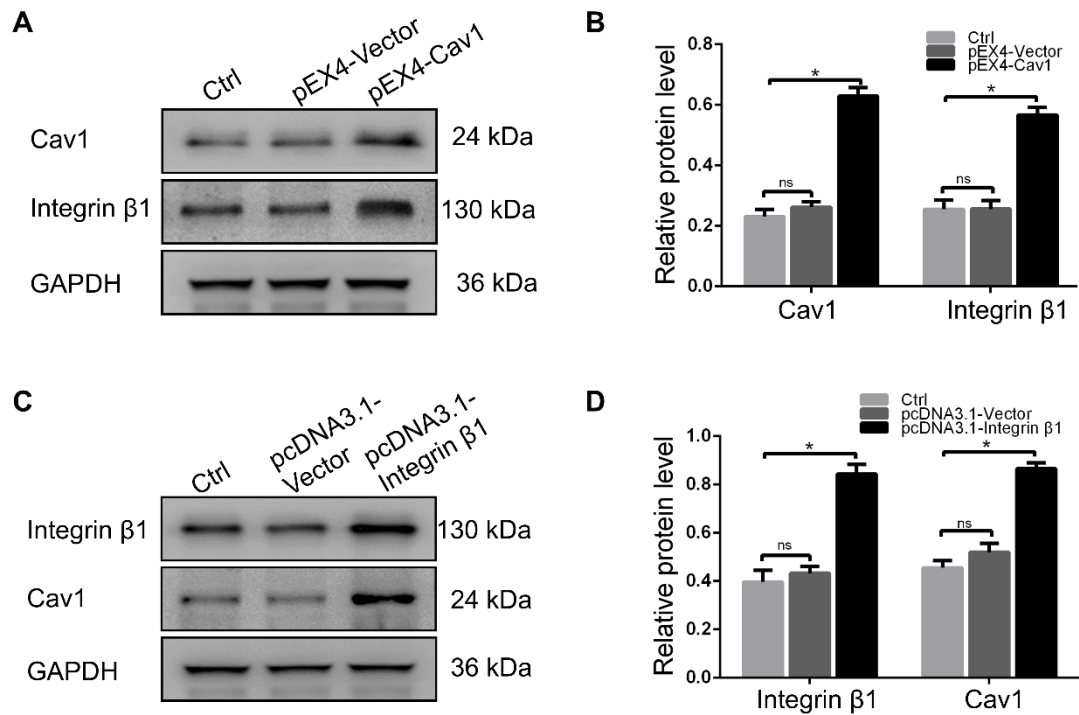

**Figure S3.** The interaction between Cav1 and integrin  $\beta$ 1. (**A, B**) Western blot analysis of integrin  $\beta$ 1 in AFCs after overexpression of Cav1. (**C, D**) Western blot analysis of Cav1 in AFCs after overexpression of integrin  $\beta$ 1. (\* $p < 0.05$ , <sup>ns</sup> $p > 0.05$  vs. Ctrl). The error bars indicate SD. N = 3.

**Figure S4**

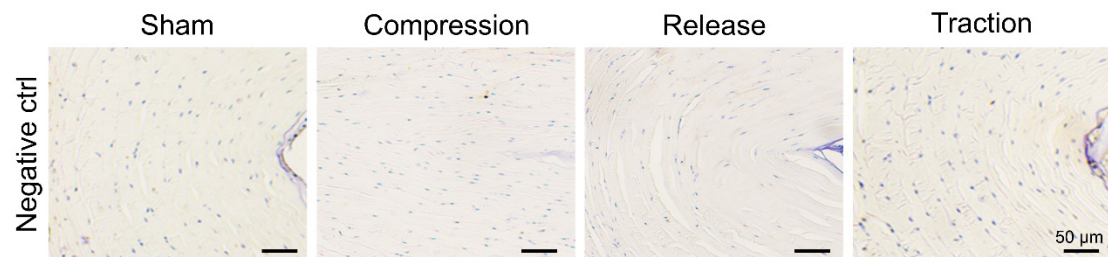

**Figure S4.** Negative control of immunohistochemistry for each group. N = 3. Scale bar = 50  $\mu$ m.
